# Supplementary material for: ATAC and SAGA histone acetyltransferase modules facilitate transcription factor binding to nucleosomes independent of their acetylation activity
Source: PubMed Central journal article supplement — Nucleic Acids Res. 2024 Dec 4;53(1):gkae1120. doi: 10.1093/nar/gkae1120 (PMC11724297; doi:10.1093/nar/gkae1120), 2024-12-04
Supplement: gkae1120_supplemental_file.pdf [file gkae1120_supplemental_file.pdf]

## Supplemental Figures

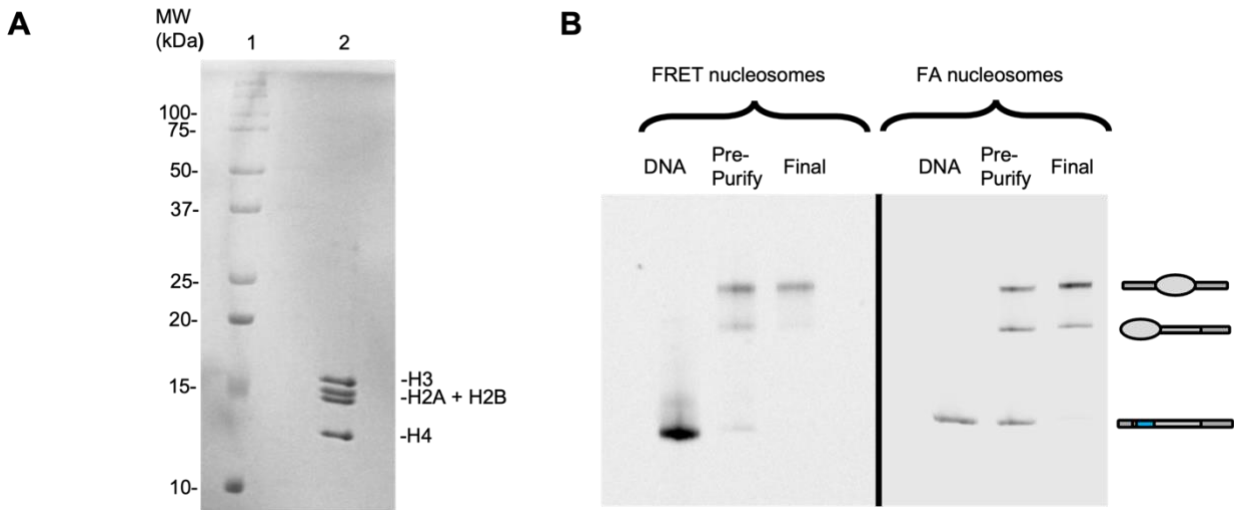

**Figure S1. Histone octamer and nucleosome preparations.** (A) Purified histone octamer visualized on SDS PAGE gel (lane 2). Lane 1: molecular weight (MW) markers in kDa. (B) Native PAGE analysis of purified nucleosomes. DNA lane contains only DNA used to make nucleosomes. Pre-Purify lane contains nucleosomes before sucrose gradient purification. Final lane contains nucleosomes after sucrose gradient purification. The slower mobility nucleosome band contains center-positioned nucleosomes while the faster mobility nucleosome band contains end-positioned nucleosomes.

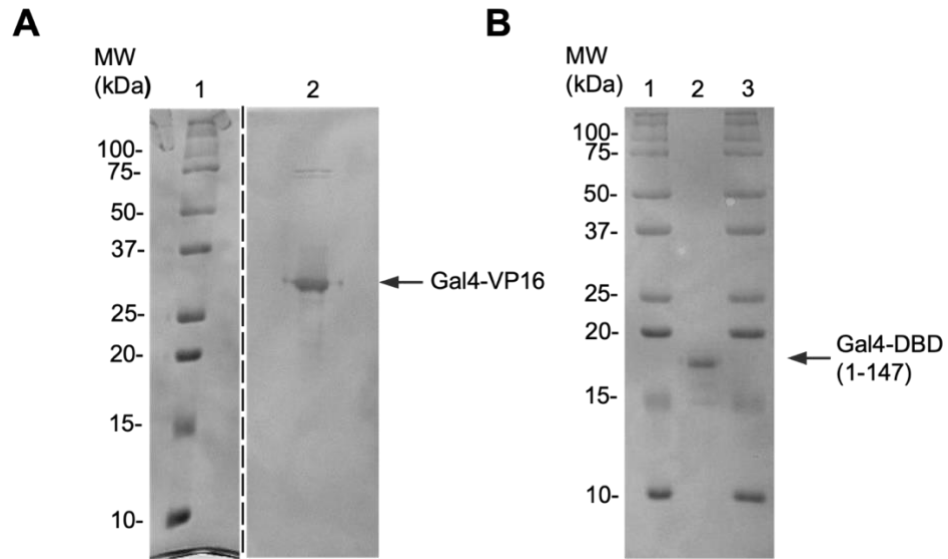

**Figure S2. Gal4-VP16 and Gal4-DBD purification.** The purified Gal4-VP16 (A) and Gal4-DBD (from amino acid 1 to 147) (B) proteins were visualized on SDS PAGE gel by Coomassie blue staining, Lane 1 in (A) and lanes 1 and 3 in (B): molecular weight (MW) markers in kDa.

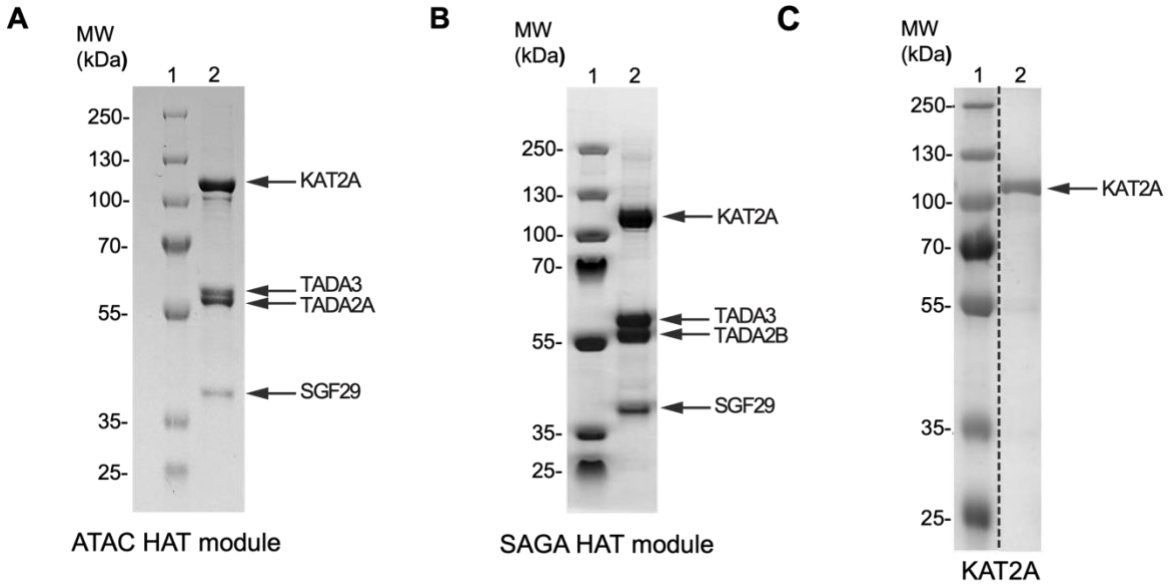

**Figure S3. ATAC and SAGA HAT module purifications.** (A) Highly purified ATAC<sub>HAT</sub> (A) and SAGA<sub>HAT</sub> (B) were visualized on SDS PAGE gel by Coomassie blue staining. Lane 1 in (A) and (B) molecular weight (MW) markers in kDa. (C) Purified Flag-KAT2A (lane 2).

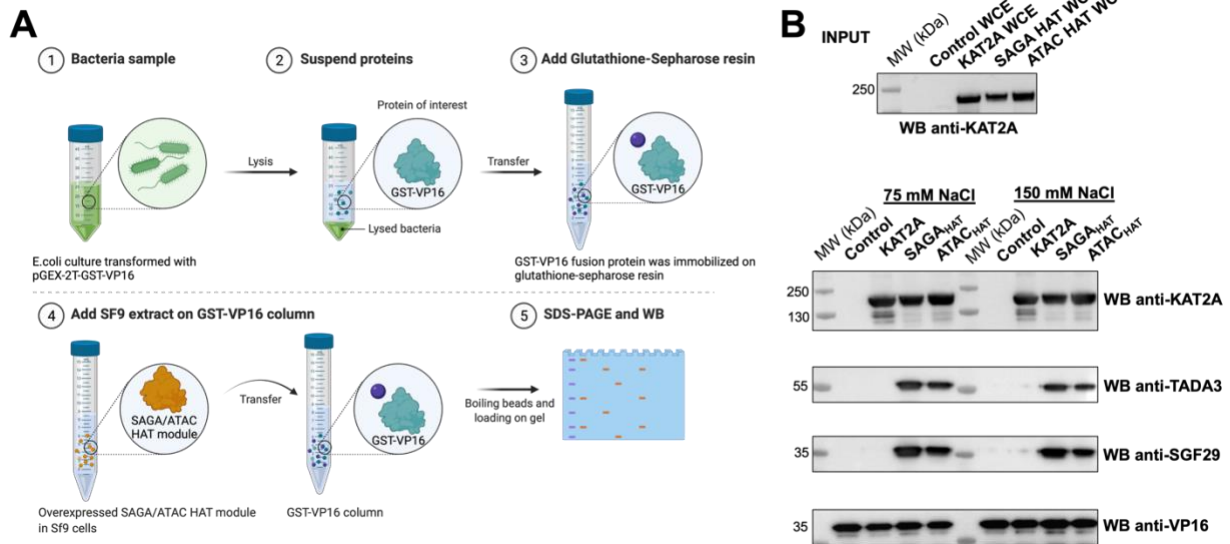

**Figure S4. Specific binding of the HAT module of SAGA and ATAC complexes to VP16-AD.** (A) Schematic representation of experimental workflow. (B) Western blot analysis of the elutes from the GST-VP16 column, using SF9 whole cell extracts (WCE) where recombinant KAT2A protein, SAGA<sub>HAT</sub> or ATAC<sub>HAT</sub> modules were overexpressed by baculovirus overexpression system in Sf9 cells, separately. Upper panel indicates overexpression levels of KAT2A in each whole cell extracts. Lower panels indicate the presence KAT2A and HAT module subunits in 10% elutions from the GST-VP16 column in the presence of either 75 mM NaCl or 150 mM NaCl. Molecular weight (MW) markers in kDa are indicated. The indicated proteins were detected by Western blot assays (WB) using antibodies raised against the indicated proteins.

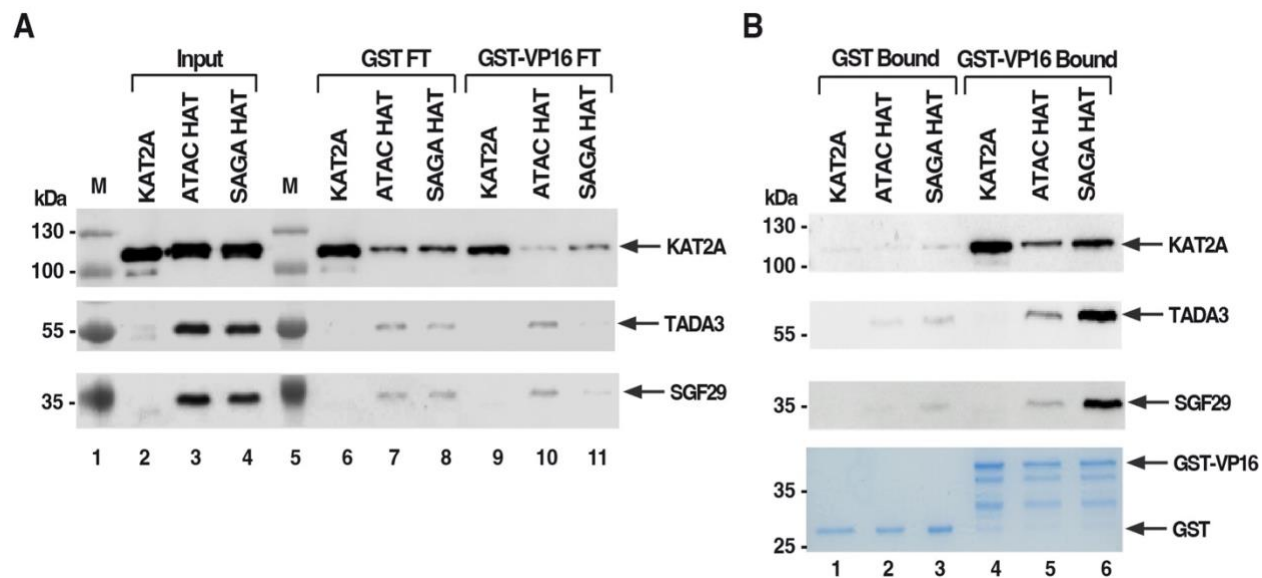

**Figure S5. Binding of recombinant KAT2A, SAGA<sub>HAT</sub> or ATAC<sub>HAT</sub> to VP16-AD.** (A) Western blots of input (0.1 %) purified KAT2A, ATAC<sub>HAT</sub>, and SAGA<sub>HAT</sub> fractions (lane 2, 3 and 4). KAT2A, ATAC<sub>HAT</sub>, and SAGA<sub>HAT</sub> GST flow through (FT) (0.1%) (lane 6, 7 and 8) and GST-VP16 FT (0.1%) (lane 9, 10 and 11). (B) Purified KAT2A, ATAC<sub>HAT</sub>, and SAGA<sub>HAT</sub> fractions were incubated with either GST (lane 1, 2, and 3) or GST-VP16 (lane 4, 5, and 6) columns, washed and eluted. Elutions (~14%) were resolved by SDS-PAGE and analyzed by Western blot with the indicated antibodies. Equal loading was tested by Coomassie brilliant blue staining of either GST (lane 1, 2, and 3) or GST-VP16 (lane 4, 5, and 6) protein containing beads. Each binding measurement was repeated in triplicate.

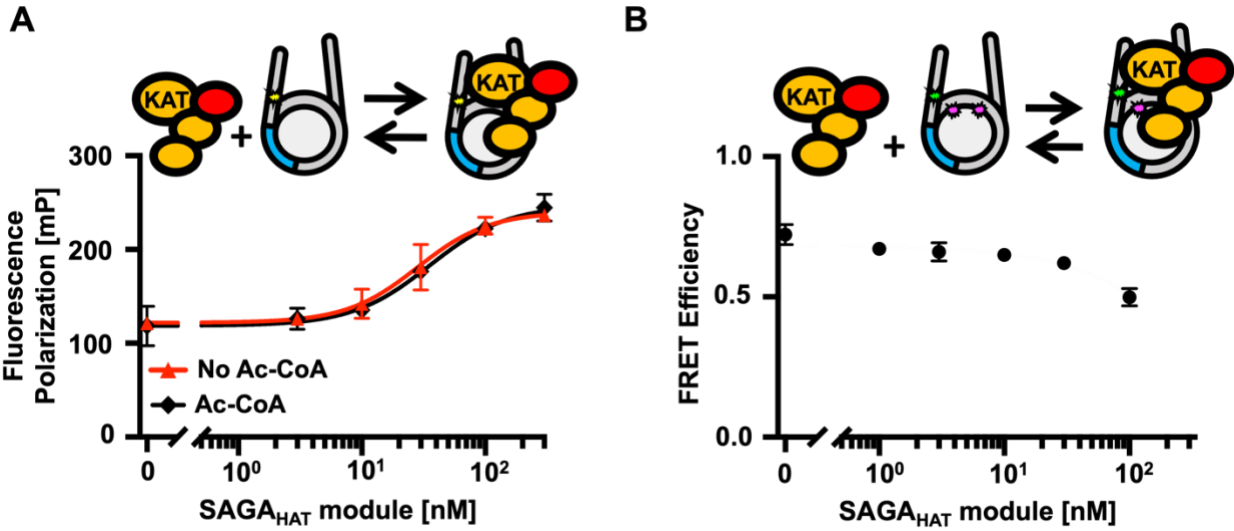

**Figure S6. SAGA<sub>HAT</sub> interactions with nucleosomes.** (A) Fluorescence Polarization in mP of nucleosomes with increasing amounts of the SAGA<sub>HAT</sub> module. The SAGA<sub>HAT</sub> module binds with an S1/2 of  $25.0 \pm 0.3$  nM (red triangle) and reaches saturating conditions around 100 nM. The SAGA<sub>HAT</sub> module with Ac-CoA binds at a S1/2 of  $37 \pm 3$  nM. (B) FRET of the SAGA<sub>HAT</sub> module binding nucleosomes at increasing amounts. Each FRET and fluorescence polarization value was determined in triplicate and the uncertainty was determined from the standard error of the three measurements.

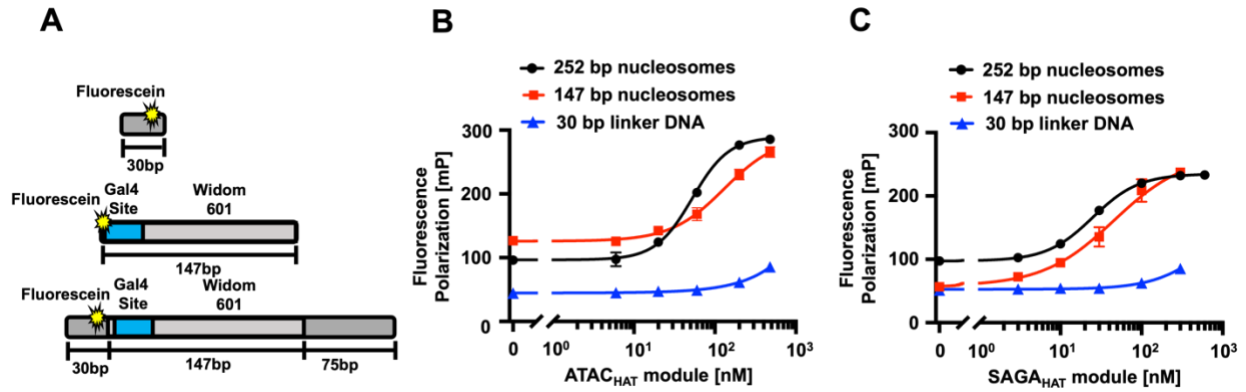

**Figure S7. ATAC<sub>HAT</sub> and SAGA<sub>HAT</sub> interactions with nucleosomes and linker DNA.** (A) DNA constructs for fluorescence polarization measures of ATAC<sub>HAT</sub> and SAGA<sub>HAT</sub> binding to 30 bp DNA, nucleosomes without linker DNA (147 bp DNA) and nucleosomes with linker DNA (252 bp DNA). (B and C). Fluorescence Polarization (mP) of nucleosomes with increasing amounts of either the ATAC<sub>HAT</sub> or SAGA<sub>HAT</sub> module. (B) The ATAC<sub>HAT</sub> module binds to 252 bp nucleosomes with a S1/2 of  $50 \pm 2$  (black circle), 147 bp nucleosomes with a S1/2 of  $130 \pm 30$  nM (red square), and to the 30 bp linker DNA with a S1/2 over 500 nM (blue triangle). (C) The SAGA<sub>HAT</sub> module binds to 252 bp nucleosomes with a S1/2 of  $25.0 \pm 0.3$  (black circle), 147bp nucleosomes with a S1/2 of  $46 \pm 10$  nM (red square), and to the 30 bp linker DNA with a S1/2 over 300 nM (blue triangle). Each fluorescence polarization value was determined in triplicate and the uncertainty was determined from the standard error of the three measurements.

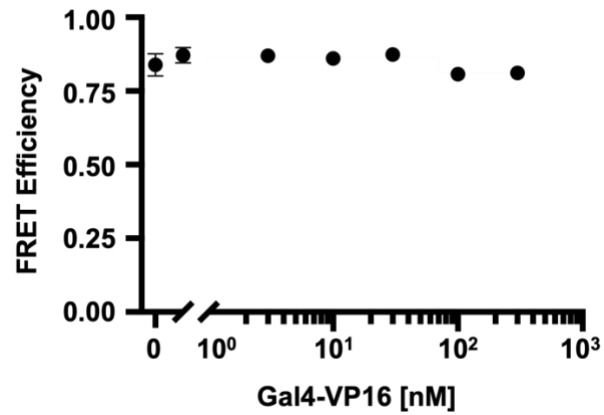

**Figure S8. Measuring Gal4 site specificity within nucleosomes.** Titrating Gal4-VP16 while measuring FRET efficiency to nucleosomes that do not contain a Gal4 binding site. This experiment shows that the Gal4 binding site is required for Gal4-induced nucleosome unwrapping. Each FRET value was determined in triplicate and the uncertainty was determined from the standard error of the three measurements.



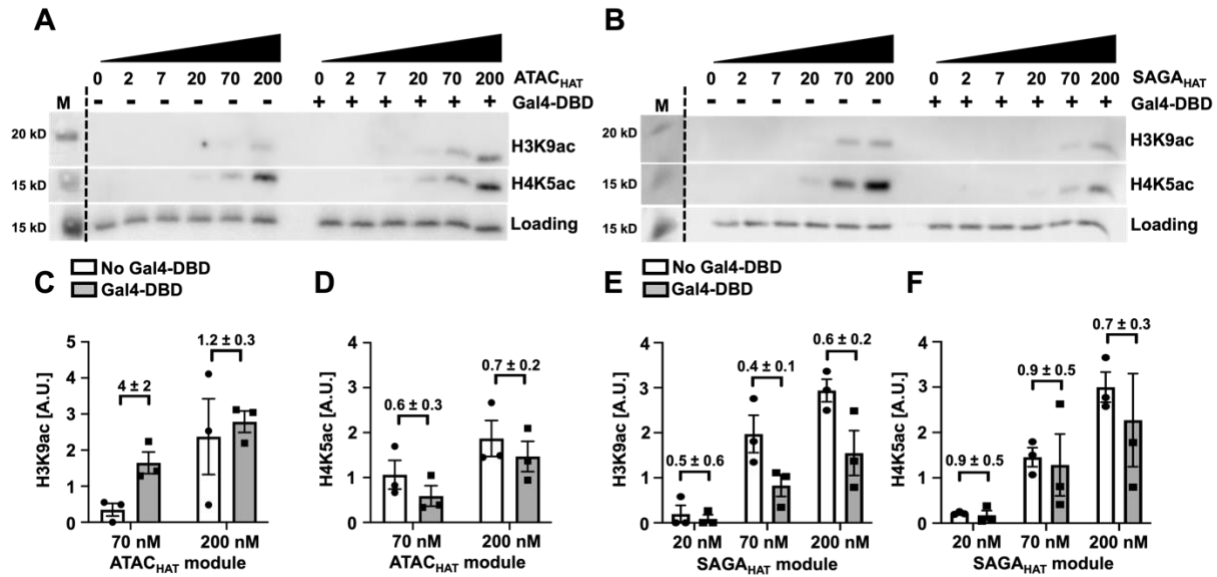

**Figure S9: Influence of the of Gal4-DBD on the acetylation by the ATAC and SAGA HAT modules.** Acetylation assay by the ATAC<sub>HAT</sub> (A) or SAGA<sub>HAT</sub> (B) modules at increasing concentrations with and without Gal4-DBD at the indicated PTM sites. The fluorescence of Cy5-labeled histone H2A within the nucleosome was used to observe nucleosome loading. Acetylation efficiency was tested by Western blot using antibodies recognizing either histone H3K9ac or H4K5ac. Images are representative of three independent experiments with similar results ( $n = 3$ ). Two-tailed, unpaired t-test with Welch's correction was conducted using Prism 9 software. Error bars represent standard error of the mean. (C, D) Bar plots of A (E, F) Bar plots of B.

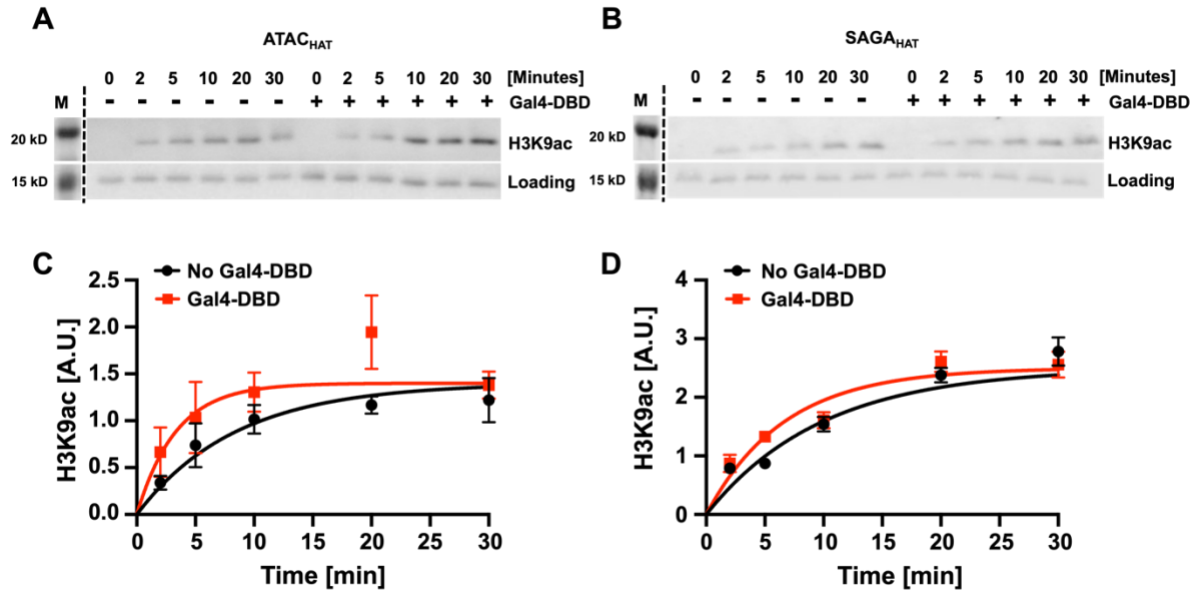

**Figure S10: The acetylation kinetics of nucleosomes at H3K9 by ATAC<sub>HAT</sub> and SAGA<sub>HAT</sub>.** Acetylation assay by the ATAC<sub>HAT</sub> (A) or SAGA<sub>HAT</sub> (B) module at increasing time with and without Gal4-DBD at H3K9ac. The fluorescence of Cy5-labeled histone H2A within the nucleosome was used to observe nucleosome loading. Acetylation efficiency was tested by Western blot using antibodies recognizing histone H3K9ac. Images are representative of three independent experiments with similar results ( $n=3$ ). Error bars represent standard error of the mean. (C) Graphs of A (D) Graph of B. The time courses were fit to a single exponential as described in the Methods section.

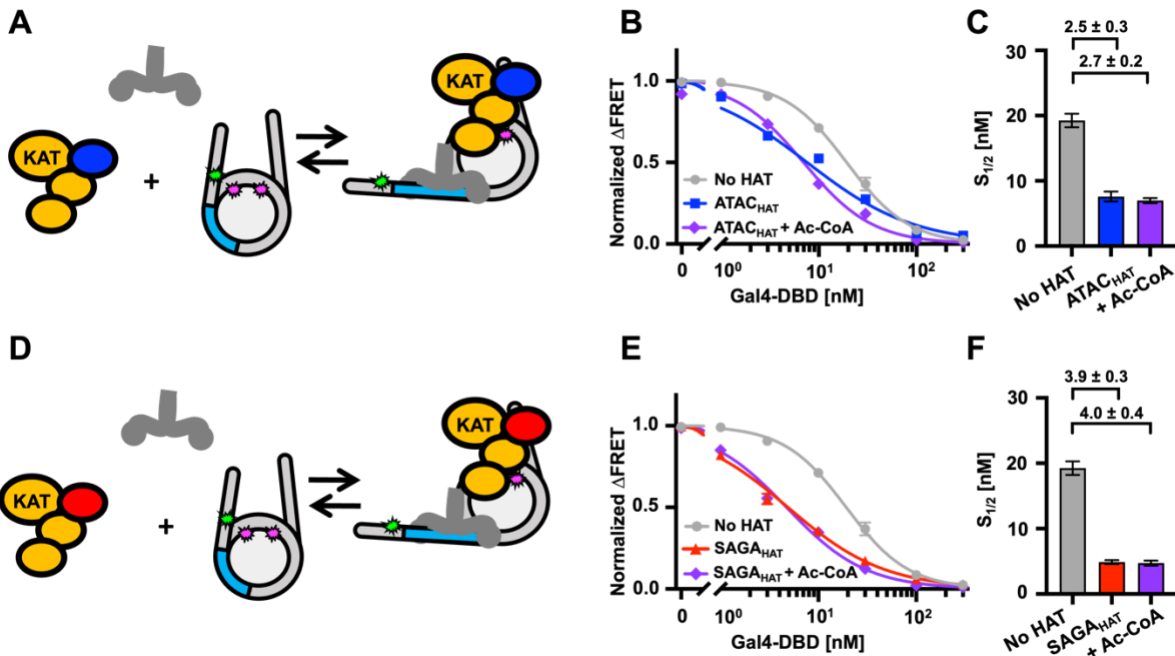

**Figure S11: ATAC<sub>HAT</sub> and SAGA<sub>HAT</sub> influence nucleosome accessibility of Gal4-DBD binding independent of Ac-CoA.** (A) Binding model of Gal4-DBD and the ATAC<sub>HAT</sub> module binding to a nucleosome. (B) Normalized  $\Delta$ FRET of Gal4-DBD binding nucleosomes with increasing amounts. Gal4-DBD binding to nucleosomes at a  $S_{1/2}$  of  $19 \pm 1$  nM (light gray circles), Gal4-DBD binding to nucleosomes with the addition of 200 nM ATAC<sub>HAT</sub> at a  $S_{1/2}$  of  $7.6 \pm 0.8$  nM (dark blue squares), and with the addition of 30  $\mu$ M Ac-CoA at a  $S_{1/2}$  of  $7.0 \pm 0.4$  nM (purple diamond). (C) Bar plot of  $S_{1/2}$  values from B (D) Binding model of Gal4-DBD and the SAGA<sub>HAT</sub> module binding to a nucleosome. (E) Normalized  $\Delta$ FRET of Gal4-DBD binding to nucleosomes at increasing amounts. Gal4-DBD binding to nucleosomes at a  $S_{1/2}$  of  $19 \pm 2$  nM (light gray circles), Gal4-DBD binding to nucleosomes with the addition of 150 nM SAGA<sub>HAT</sub> at a  $S_{1/2}$  of  $4.9 \pm 0.3$  nM (red triangles), and with the addition of 30  $\mu$ M Ac-CoA at a  $S_{1/2}$  of  $4.7 \pm 0.4$  nM (purple diamond). (F) Bar plot of  $S_{1/2}$  and standard error values from the weighted fits to binding isotherms in E. Each FRET value was determined in triplicate and the uncertainty is determined from the standard error of the three measurements. The  $S_{1/2}$  values were determined from a weighted fit of the titration to a binding isotherm and the uncertainty was determined from the covariance matrix of the weighted fit.

## Supplemental Tables

| Binding Target     | HAT Module | Ac-CoA | S <sub>1/2</sub> (nM) | P value | P < 0.2 |
|--------------------|------------|--------|-----------------------|---------|---------|
| 252 bp nucleosomes | ATAC HAT   | No     | 50 ± 2                | n/a     | n/a     |
| 252 bp nucleosomes | ATAC HAT   | Yes    | 40 ± 1                | 0.02    | yes     |
| 252 bp nucleosomes | SAGA HAT   | No     | 25.0 ± 0.3            | n/a     | n/a     |
| 252 bp nucleosomes | SAGA HAT   | Yes    | 37 ± 3                | 0.06    | yes     |
| 147 bp nucleosomes | ATAC HAT   | No     | 130 ± 30              | 0.12    | yes     |
| 147 bp nucleosomes | SAGA HAT   | No     | 50 ± 10               | 0.13    | yes     |
| 30 bp DNA          | ATAC HAT   | No     | > 500                 | n/a     | n/a     |
| 30 bp DNA          | SAGA HAT   | No     | > 300                 | n/a     | n/a     |

**Table S1. Fluorescence polarization fit values.** The S<sub>1/2</sub> values were determined from weighted fits if the HAT module titrations to binding isotherms. The uncertainty was determined from the covariance matrix of the weighted fit. P values for the 252 nucleosomes with Ac-CoA to 252 nucleosomes without Ac-CoA. The P values for 147 bp nucleosomes is in comparison to 252 bp nucleosomes.

| HAT (nM)      | TF          | PTM    | Blot Signal | Ratio     | P value | P < 0.2 |
|---------------|-------------|--------|-------------|-----------|---------|---------|
| ATAC (70 nM)  | + Gal4-VP16 | H3K9ac | 0.7 ± 0.1   | 5 ± 2     | 0.01    | yes     |
|               | - Gal4-VP16 | H3K9ac | 0.15 ± 0.05 |           |         |         |
| ATAC (200 nM) | + Gal4-VP16 | H3K9ac | 2.0 ± 0.2   | 1.0 ± 0.2 | 1.00    | n.s.    |
|               | - Gal4-VP16 | H3K9ac | 2.0 ± 0.3   |           |         |         |
| ATAC (70 nM)  | + Gal4-VP16 | H4K5ac | 0.7 ± 0.4   | 6 ± 5     | 0.28    | n.s.    |
|               | - Gal4-VP16 | H4K5ac | 0.11 ± .06  |           |         |         |
| ATAC (200 nM) | + Gal4-VP16 | H4K5ac | 2.2 ± 0.5   | 1.0 ± 0.3 | 0.91    | n.s.    |
|               | - Gal4-VP16 | H4K5ac | 2.3 ± 0.5   |           |         |         |
| SAGA (20 nM)  | + Gal4-VP16 | H3K9ac | 1.0 ± 0.3   | 3 ± 1     | 0.10    | yes     |
|               | - Gal4-VP16 | H3K9ac | 0.3 ± 0.1   |           |         |         |
| SAGA (70 nM)  | + Gal4-VP16 | H3K9ac | 2.7 ± 0.8   | 1.8 ± 0.6 | 0.30    | n.s.    |
|               | - Gal4-VP16 | H3K9ac | 1.5 ± 0.3   |           |         |         |
| SAGA (200 nM) | + Gal4-VP16 | H3K9ac | 3 ± 1       | 1.7 ± 0.6 | 0.38    | n.s.    |
|               | - Gal4-VP16 | H3K9ac | 1.8 ± 0.3   |           |         |         |
| SAGA (20 nM)  | + Gal4-VP16 | H4K5ac | 0.25 ± 0.03 | 2.5 ± 2.5 | 0.37    | n.s.    |
|               | - Gal4-VP16 | H4K5ac | 0.1 ± 0.1   |           |         |         |
| SAGA (70 nM)  | + Gal4-VP16 | H4K5ac | 2.0 ± 0.3   | 2.2 ± 0.4 | 0.11    | yes     |
|               | - Gal4-VP16 | H4K5ac | 0.9 ± 0.08  |           |         |         |
| SAGA (200 nM) | + Gal4-VP16 | H4K5ac | 2.9 ± 0.8   | 1.3 ± 0.5 | 0.49    | n.s.    |
|               | - Gal4-VP16 | H4K5ac | 2.2 ± 0.6   |           |         |         |

**Table S2. Summary of ATAC<sub>HAT</sub> and SAGA<sub>HAT</sub> Western blot analysis with Gal4-VP16.** Each blot signal is the average of at least three measurements. The uncertainty is determined from the standard error.

| HAT Module | TF        | $\tau_{\text{noTF}}$ (sec) | $\tau_{\text{TF}}$ (sec) | $\tau_{\text{noTF}} / \tau_{\text{TF}}$ |
|------------|-----------|----------------------------|--------------------------|-----------------------------------------|
| ATAC       | Gal4-VP16 | 60 ± 10                    | 13.0 ± 0.5               | 4.6 ± 0.2                               |
| SAGA       | Gal4-VP16 | 40 ± 4                     | 7.8 ± 0.2                | 5.1 ± 0.1                               |
| ATAC       | Gal4-DBD  | 8 ± 1                      | 3 ± 1                    | 2.7 ± 0.4                               |
| SAGA       | Gal4-DBD  | 10 ± 2                     | 6.6 ± 0.3                | 1.5 ± 0.2                               |

**Table S3. Summary of ATAC<sub>HAT</sub> and SAGA<sub>HAT</sub> time course Western blot analysis with Gal4-VP16 and Gal4-DBD.** The time courses were determined from the weighed fit with a single exponential as described in the Methods section to determine characteristic time,  $\tau$ , for the acetylation reaction. The uncertainties were determined from the covariance matrix of the weighted fit.

| HAT (nM)      | TF         | PTM    | Blot Signal | Ratio     | P value | P < 0.2 |
|---------------|------------|--------|-------------|-----------|---------|---------|
| ATAC (70 nM)  | + Gal4-DBD | H3K9ac | 1.7 ± 0.3   | 4 ± 2     | 0.03    | yes     |
|               | - Gal4-DBD | H3K9ac | 0.4 ± 0.2   |           |         |         |
| ATAC (200 nM) | + Gal4-DBD | H3K9ac | 2.8 ± 0.3   | 1.2 ± 0.3 | 0.74    | n.s.    |
|               | - Gal4-DBD | H3K9ac | 2.4 ± 0.6   |           |         |         |
| ATAC (70 nM)  | + Gal4-DBD | H4K5ac | 0.6 ± 0.3   | 0.6 ± 0.3 | 0.30    | n.s.    |
|               | - Gal4-DBD | H4K5ac | 1.06 ± .08  |           |         |         |
| ATAC (200 nM) | + Gal4-DBD | H4K5ac | 1.9 ± 0.6   | 0.7 ± 0.2 | 0.49    | n.s.    |
|               | - Gal4-DBD | H4K5ac | 2.8 ± 0.3   |           |         |         |
| SAGA (20 nM)  | + Gal4-DBD | H3K9ac | 0.09 ± 0.09 | 0.5 ± 0.6 | 0.66    | n.s.    |
|               | - Gal4-DBD | H3K9ac | 0.2 ± 0.2   |           |         |         |
| SAGA (70 nM)  | + Gal4-DBD | H3K9ac | 0.8 ± 0.2   | 0.4 ± 0.1 | 0.09    | yes     |
|               | - Gal4-DBD | H3K9ac | 2.0 ± 0.4   |           |         |         |
| SAGA (200 nM) | + Gal4-DBD | H3K9ac | 1.6 ± 0.5   | 0.6 ± 0.2 | 0.09    | yes     |
|               | - Gal4-DBD | H3K9ac | 2.9 ± 0.3   |           |         |         |
| SAGA (20 nM)  | + Gal4-DBD | H4K5ac | 0.2 ± 0.1   | 0.9 ± 0.5 | 0.70    | n.s.    |
|               | - Gal4-DBD | H4K5ac | 0.22 ± 0.02 |           |         |         |
| SAGA (70 nM)  | + Gal4-DBD | H4K5ac | 1.3 ± 0.7   | 0.9 ± 0.5 | 0.83    | n.s.    |
|               | - Gal4-DBD | H4K5ac | 1.5 ± 0.2   |           |         |         |
| SAGA (200 nM) | + Gal4-DBD | H4K5ac | 2 ± 1       | 0.7 ± 0.3 | 0.56    | n.s.    |
|               | - Gal4-DBD | H4K5ac | 3.0 ± 0.3   |           |         |         |

**Table S4. Summary of ATAC<sub>HAT</sub> and SAGA<sub>HAT</sub> Western blot analysis with Gal4-DBD.** Each blot signal is the average of at least three measurements. The uncertainty is determined from the standard error.

| TF        | HAT Module | Ac-CoA | $S_{1/2}$ (nM) | $S_{1/2}^{\text{noHAT}} / S_{1/2}^{\text{HAT}}$ | P value |
|-----------|------------|--------|----------------|-------------------------------------------------|---------|
| Gal4-VP16 | None       | -      | $55 \pm 2$     | N.A.                                            | N.A.    |
| Gal4-VP16 | ATAC       | -      | $5.3 \pm 0.7$  | $10 \pm 1$                                      | 0.0006  |
| Gal4-VP16 | ATAC       | +      | $7 \pm 1$      | $8 \pm 1$                                       | 0.0003  |
| Gal4-VP16 | SAGA       | -      | $7 \pm 1$      | $8 \pm 1$                                       | 0.0003  |
| Gal4-VP16 | SAGA       | +      | $6.5 \pm 0.9$  | $8 \pm 1$                                       | 0.0003  |
| Gal4-DBD  | None       | -      | $19 \pm 1$     | N.A.                                            | N.A.    |
| Gal4-DBD  | ATAC       | -      | $7.6 \pm 0.8$  | $2.5 \pm 0.3$                                   | 0.001   |
| Gal4-DBD  | ATAC       | +      | $7.0 \pm 0.4$  | $2.7 \pm 0.2$                                   | 0.003   |
| Gal4-DBD  | SAGA       | -      | $4.9 \pm 0.3$  | $3.9 \pm 0.3$                                   | 0.003   |
| Gal4-DBD  | SAGA       | +      | $4.7 \pm 0.4$  | $4.0 \pm 0.4$                                   | 0.002   |

**Table S5. Measurement values of transcription factor  $S_{1/2}$  with HAT modules.** The  $S_{1/2}$  values were determined from weighted fits of the HAT module titrations to binding isotherms. The uncertainty was determined from the covariance matrix of the weighted fit.
